# Supplementary material
Source: MDPI journal article supplement (https://www.mdpi.com/1424-8247/14/5/460)
Supplement: s1 [file s1]

**Supplementary table S1:** Mean observed calibration data for the each analyte. Y is the chromatographic response (Analyte/IS area ratio), while  $x$  is the analyte concentration;  $1/x$  weighing was applied, in order to obtain optimal fitting to the lowest part of the calibration curves.

| DRUGs | R <sup>2</sup> | Equation                                             |
|-------|----------------|------------------------------------------------------|
| TFV   | 0.997          | $y = 0.0410 x + 0.0172$                              |
| 3TC   | 0.998          | $y = -(2.03 \times 10^{-7}) x^2 + 0.0032 x + 0.0060$ |
| FTC   | 0.997          | $y = -(1.94 \times 10^{-7}) x^2 + 0.0037 x + 0.0081$ |
| ABV   | 0.996          | $y = 0.0041 x + 0.0108$                              |
| AZT   | 0.996          | $y = 0.00073 x + 0.00112$                            |
| TAF   | 0.997          | $y = 0.1810 x + 0.0851$                              |

**Supplementary table S2:** Mean accuracy percentages of the back-calculated concentrations of calibration standards (STDs) during the validation sessions.

| DRUGs | STD1<br>-<br>LLOQ | STD2  | STD3  | STD4  | STD5  | STD6  | STD7  | STD8 | STD9<br>-<br>ULOQ |
|-------|-------------------|-------|-------|-------|-------|-------|-------|------|-------------------|
| TFV   | 116.2             | 108.1 | 96.2  | 98.2  | 103.6 | 102.7 | 98.1  | 98.2 | 96.6              |
| 3TC   | 114.5             | 105.6 | 102.3 | 101.5 | 104.9 | 102.3 | 99.8  | 97.1 | 97.5              |
| FTC   | 116.2             | 109.7 | 100.2 | 99.8  | 101.2 | 100.6 | 96.7  | 97.2 | 96.3              |
| ABV   | 84.6              | 103.7 | 104.2 | 105.2 | 106.7 | 105.6 | 103.1 | 98.2 | 95.6              |
| AZT   | 112.2             | 108.3 | 107.2 | 98.7  | 102.2 | 106.3 | 101.7 | 98.0 | 96.2              |
| TAF   | 117.0             | 106.3 | 104.8 | 102.1 | 98.3  | 100.5 | 98.5  | 97.6 | 97.4              |
